# Supplementary material for: The Predictive Value of Myoglobin for Sepsis-Induced Cardiomyopathy
Source: Research Square preprint supplement (doi:10.21203/rs.3.rs-5130613/v1), 2024-10-23
Supplement: Supplementary file 1 [file 8a6906c4e573b362ede8a778.xlsx]

## Sheet: Sheet1
序号	Age (year)	Gender: Male 1, Female 2	BMI(kg/m2)	SICM	CO (L/min) Normal value range：4-6	LVEF (%) normal > 50%	liver injury	kidney injury	septic shock	SOFA	APACHE II	wbc（4-10*109/L）Leukocyte count (×109/L)	NRL	血红蛋白（g/dL)g/L×0.1→g/dL	血小板（100-300）PLT count (×109/L)	CRP（0-8mg/L)	myo（25-58ng/ml）	pct（<0.051 ng/ml)	NT-proBNP(0-349pg/ml)	lac（0.1-2.7mmol/L)mmol/L×9.608→mg/dL	ALT(0-40IU/L)	AST(0-46IU/L)	egfr	CREA(mg/dL)umol/L×0.01131→mg/dL	GLU（3.9-6.1mmol/L) 1mmol/L=18mg/dL	LDH（109-245IU/L）	CK-MB（2-25IU/L）	Serum potassium, 3.5-5.5mmol/L) mmol/L×3.91→mg/dL	Na(135-148mmol/L) mmol/L×2.299→mg/dL	TnI（0-0.02μg/L）	MBP（mmHg)	Blood pH（7.35-7.45）		血氧饱和度	氧合指数 (400-500mmHg)1kpa=7.5mmHg	IL-2（0-5.71pg/ml)	IL-4（0-3pg/ml)	IL-6（0-5.3pg/ml)
1	75	1	18.6	2	7.8	74	2	2	2	7	28	19.8	34.6111	11.6	525	133.21	60.2	1.14	366	31.7064	39	48	1236.37	0.085956	194.58	226	10	16.1874	304.388	0.003	172	7.462	50.1	85.4	239	1.72	2.03	334.1
2	81	1	20.3	2	6.2	69.9	1	1	1	17	21	1.08	4.42105	7.2	7	172.57	1128	1.4	10075	74.9424	126	446	15	3.87933	133.38	4783	15	15.4445	305.997	0.02	81	7.375	119	97.9	568	2.31	1.32	639
3	77	2	25.4	2	3.2	60.9	2	1	2	6	19	25.7	23.1456	9.1	261	108.21	1628	76.21	4011	44.1968	13	44	28.8799	1.71912	202.32	238	24	14.3888	309.905	0.849	112	7.487	106	98.3	505	0.85	0.51	5000
4	71	1	14.5	2	6.5	58.9	2	2	2	4	18	4.68	21.8889	16.2	136	168.54	71.2	4.39	401	33.628	19	64	145.53	0.55419	161.82	368	10	13.5677	306.687	0.006	132	7.415	86	97.3	409	1.24	2.38	115.4
5	85	1	20.5	1	3.8	48	2	1	2	7	19	10.99	36.0345	14.1	123	32.85	3000	62.19	23525	64.3736	19	117	26.9034	2.31855	68.76	418	38	11.4954	324.159	3.16	105	7.436	79	96.1	376	1.46	1.48	5000
6	78	1	25.5	2	4.8	65.3	2	1	1	7	23	27.08	43.8448	5.7	159	55.9	298.3	83.98	9574	35.5496	14	30	29.886	2.1489	134.64	314	60.8	16.8912	321.86	0.018	78	7.49	182	99.7	868	4.65	2.14	319.8
7	79	2	26.6	1	3.8	41	1	1	1	12	25	20.51	17.9143	10.6	56	153.31	1408	87.58	20441	66.2952	422	424	25.0787	1.93401	166.5	395	62	13.685	308.986	0.148	79	7.318	70.6	92.1	336	0.46	0.66	160.9
8	72	1	26.1	2	4.8	56.2	2	1	2	8	17	11.74	9.19048	12.5	155	50.5	949.3	0.242	194	18.2552	34	38	49.246	1.41375	230.22	553	17.3	18.1424	367.84	0.04	108	7.408	98.4	97.4	468	3.13	1.39	16
9	75	1	19	1	4.2	35.3	2	1	2	6	19	17.55	12.1803	16.6	100	152.98	96.5	65.53	3404	31.7064	33	14	34.2506	1.9227	295.92	218	3.8	15.2881	343.93	0.058	90	7.39	80	96	381	2.39	2.58	203.45
10	73	2	26.8	1	4.1	44.1	2	1	1	9	21	1.55	2.4	12.6	121	56.49	415.2	48.02	12316	72.06	12	25	30.1067	1.67388	547.38	28	12.8	13.3331	298.18	0.206	72	7.478	69.9	95	333	2.83	2.35	5000
11	78	1	22.6	1	2.9	40.2	2	1	1	11	21	7.87	5.856	9	162	127.65	389	36.37	35000	39.3928	17	49	48.0088	1.42506	81.9	267	12	16.3438	320.481	0.96	79	7.384	109	97.8	520	2.76	0.93	998.9
12	79	1	30.2	2	2.2	67.9	2	1	1	11	18	12.79	70.4706	11.7	82	44.62	898.4	22.13	1169	38.432	50	86	61.8072	1.14231	115.56	119	26	15.0535	309.675	0.005	66	7.453	126	98.6	600	0.97	1.88	217.3
13	69	1	25.8	2	3.1	52.6	2	1	2	5	17	15.57	34.0909	15.7	170	222.7	364.9	46.55	1529	110.492	62	164	47.9002	1.45899	157.68	997	4	14.3106	292.203	0.006	92	7.513	118	98.6	562	1.26	1.43	324.21
14	79	2	20.3	1	3.3	37	2	1	2	6	26	23.74	14.8639	9.5	176	206.27	458.7	100	6406	33.628	38	68	23.3378	2.05842	193.86	258	14	11.8864	308.066	0.171	94	7.383	108	97.8	515	1.16	1.09	46.78
15	78	1	26.3	2	2	60	2	1	1	9	24	49.61	73.3636	9.1	245	184.17	168.8	34.11	2851	27.8632	63	73	44.7167	1.51554	102.78	320	19	14.9362	292.433	0.009	76	7.507	74.5	95.4	355	5.76	3.12	2149.8
16	68	2	23.3	1	3.6	47.6	2	1	1	16	27	18.08	12.9286	9.8	176	31.11	1742	5.49	13923	43.236	25	39	6.2409	6.62766	206.64	396	20	15.1317	296.341	0.073	71	7.24	139	98.5	661	2.46	1.11	4169
17	65	1	21.6	2	6.9	60.2	2	1	2	4	17	17.43	53.0625	7.6	318	55.48	67.5	2.09	213	28.824	14	20	24.1481	2.66916	124.02	211	9	17.1258	321.17	0.007	102	7.362	88.1	95.7	419	1.69	1.67	537.8
18	74	1	19.5	1	3.8	31.8	2	1	2	5	21	10.49	20.8444	12.5	193	90.13	3000	22.9	886	19.216	21	40	22.9584	2.72571	121.32	256	51.2	16.2265	311.744	0.192	94	7.355	79.6	95.2	379	1.52	1.33	57
19	71	2	24.8	2	5.1	70	2	2	2	4	13	10.47	14.8906	13.4	108	138.02	80.6	1.81	419	28.824	20	28	51.7566	1.05183	274.68	370	42.2	15.0535	315.423	0.004	92	7.41	89	96	423	2.18	2.31	416.5
20	71	1	25.4	1	2.5	31.8	1	1	2	10	22	44.12	45.0421	10.7	54	73.79	2289	100	3635	37.4712	41	363	14.1609	4.17339	146.34	2310	102.2	15.9137	321.17	0.1	92	7.361	105	97.8	498	1.22	2.03	39.1
21	69	1	20.7	2	5.4	75.8	2	2	2	5	13	11.99	15.7727	13.5	215	110.96	57.8	8.08	326	15.3728	51	60	72.5708	1.0179	261.18	296	8	16.1483	315.653	0.002	96	7.446	85.4	95.5	407	1.99	2.49	199.2
22	78	1	26.2	1	3.6	45.5	2	1	2	4	24	19.71	12.3066	13.7	171	22.7	2135	8.27	1366	40.3536	87	226	24.4629	2.55606	218.34	475	110	19.5891	331.286	0.209	97	7.106	110	96.7	526	2.01	2.71	1121.5
23	89	1	18	1	3.7	48.3	2	1	2	6	26	17.61	31.0769	11.2	103	229.25	144.5	100	780	15.3728	65	72	18.1498	3.23466	437.94	552	68.5	20.6057	297.261	0.043	112	7.385	107	98.3	510	2.11	0.91	115.9
24	66	2	30.3	1	3.4	33.5	2	1	1	8	23	29.14	30.0109	9.6	62	75.11	223.6	1.85	11261	21.1376	16	29	29.1333	1.75305	261	5722	8	17.204	299.1	0.026	80	7.44	183	100	289	22.51	20.81	99.9
25	67	1	20.2	2	4	60	2	1	1	9	20	7.38	4.17742	11.1	57	54.31	324	12.31	1193	13.4512	12	16	5.90061	9.00276	166.32	555	14.6	17.7123	314.043	0.001	112	7.359	93.8	96.5	446	2.59	2.29	4.45
26	68	2	30.5	1	2.8	47.1	2	1	1	13	29	21.44	16.9913	12.5	122	226.65	2022	100	35000	49.0008	19	41	16.9133	2.79357	123.48	299	36	13.294	339.792	0.129	54	7.465	51.6	83.6	246	2.44	1.84	3061
27	70	1	24.9	1	3.7	27.6	2	1	1	14	23	4.18	1.03448	13.3	66	23.91	477	56	1120	60.5304	78	27	41.4024	1.65126	633.42	231	5	16.9303	311.974	0.086	63	7.334	49.6	76.7	236	4.67	0	756.7
28	89	1	24.2	2	7	58.9	2	1	1	6	22	13.35	34.1622	12.5	297	165.69	1078	9.93	6595	55.7264	15	34	30.0056	2.09235	107.82	268	50.7	18.6898	326.688	0.008	83	7.26	66	89	314	1.76	3.98	4623
29	67	1	22.7	1	2.3	38.1	2	2	2	6	16	4.38	4.09091	9.2	10	174.38	3000	2.28	450	134.512	43	164	76.9378	0.97266	113.04	1202	158.8	20.2929	322.55	0.323	93	7.339	111	97.4	527	1.83	1.17	47.4
30	75	1	29.2	1	3.2	33.1	2	2	2	6	22	10.99	31.1176	8	128	50.82	237.4	1.85	35000	116.257	13	12	481.733	0.194532	111.42	711	12	14.4279	354.046	0.004	91	7.19	.	.	296	4.69	2.28	41.6
31	75	2	19.4	1	3.4	39.7	2	1	2	5	25	13.83	26.1	5.6	119	156.26	307.7	39.44	35000	22.0984	15	19	7.75805	5.39487	573.66	194	8	17.2822	288.984	0.089	93	7.32	79	94	206	1.12	0.48	190.5
32	66	2	22.7	1	3.7	37	2	2	2	4	17	10.47	6.96667	11.4	192	195.76	30.8	0.167	593	58.6088	9	14	90.581	0.65598	93.6	319	4.8	12.1992	327.148	0.013	94	7.486	42.3	80.2	201	7.66	5.89	146.86
33	66	1	23.4	1	2.7	40.1	2	1	1	14	25	1.2	0.376471	15.6	83	283.19	1960	100	3983	24.02	51	136	7.47781	7.3515	136.08	606	44.1	11.6518	342.551	0.763	74	7.588	163	99.2	776	3.01	5.58	5000
34	77	2	19.8	1	3.8	38.7	1	1	1	16	29	39.43	53.5211	10.7	15	231.88	2178	100	35000	103.766	41	207	16.6473	2.77095	117.72	992	83	13.8805	309.216	0.027	68	7.268	167	98.7	793	0.78	0.3	5000
35	67	1	26.7	1	4.6	37.6	1	2	1	16	24	0.14	0.3	7.4	17	64.32	313.4	8.96	518	79.7464	150	444	56.7222	1.26672	280.8	108	48.8	13.7632	310.825	0.096	76	7.56	67	96	231	2.15	3.57	5000
36	88	1	27.5	1	3.8	44.5	2	2	1	4	27	64.42	72.5	11.4	361	50.01	674.7	9.41	1158	50.9224	29	34	65.6938	1.06314	193.68	259	12.8	15.0535	377.496	0.031	74	7.512	53.9	87.2	257	7.66	5.89	126.8
37	87	1	26.2	2	4.4	64.6	2	2	2	3	20	24.68	40.9138	11.9	192	112.91	44.2	25.32	730	30.7456	64	99	62.0238	1.11969	154.26	353	10	15.4054	326.688	0.005	107	7.417	84.1	96.2	400	1.75	1.45	16
38	86	1	25.3	2	5.1	69.3	1	2	2	5	16	4.84	5.22368	13.9	208	325.08	173	43.92	1546	57.648	11	24	62.9022	1.10838	141.12	210	10	17.7123	301.859	0.004	90	7.435	41.1	76.3	196	1.92	1.48	5000
39	86	1	21.2	1	3.3	41.5	1	1	1	6	22	13.79	26.2449	12.9	162	65.36	123.8	14.34	2610	40.3536	18	25	37.0594	1.75305	164.34	216	11.8	13.1767	312.434	0.01	71	7.25	.	.	263	5.43	2	231.4
40	85	2	23.8	1	2.9	32	1	1	1	6	32	18.45	15.215	8.5	152	135.54	52.2	100	2664	14.412	18	31	17.3762	2.62392	183.96	279	5	13.294	306.687	0.866	78	7.484	61.5	92.9	293	0.89	1.55	211.8
41	84	1	24.1	1	6.1	42	1	1	1	9	18	10.83	7.13934	9	106	18.69	543.5	0.368	17574	35.5496	465	566	36.4221	1.78698	145.62	1787	29	22.9908	313.354	0.026	72	7.423	107	97.5	509	1.59	3	2131.5
42	82	1	22.6	1	2.9	33.9	1	2	2	9	22	5.65	15.375	4.4	14	161.09	176.9	3.19	4447	24.02	40	127	293.671	0.29406	124.56	444	53	14.7407	296.801	0.108	93	7.505	77.4	96.4	369	1.11	1.42	5000
43	80	1	26.4	2	4.8	60.1	2	1	2	4	19	6.15	10.8571	15.1	84	266.91	55.8	20.27	437	14.412	22	31	62.3615	1.131	139.68	184	6	11.9255	304.618	0.018	90	7.473	100	97.8	477	3.26	2.84	798
44	80	1	20.3	2	5.4	61.5	1	2	2	4	13	7.59	9.34783	13.9	147	21.72	97.3	0.075	121	15.3728	10	20	79.5289	0.91611	91.08	248	9	20.8403	311.744	0.002	92	7.324	96.4	96.7	459	2.47	2.9	16.3
45	77	2	18.9	2	4.9	58.4	2	1	1	15	19	14.02	15.5375	8.7	115	83.48	166.8	86.98	6470	28.824	14	23	25.2096	1.93401	168.3	203	16	13.2158	319.101	0.061	84	7.42	201	100	219	2.78	3.52	1128
46	80	1	19.8	2	7.5	60.3	2	1	1	8	20	6.15	10.8571	15.1	84	266.91	55.8	20.27	321	9.41584	22	31	62.3615	1.131	139.68	184	6	11.9255	304.618	0.021	67	7.473	100	97.8	477	1.33	4.37	1267.76
47	78	1	21.8	1	3.4	33.9	1	1	1	10	21	13.78	6.44	13.5	55	320.46	798.3	100	5692.3	32.6672	63	201	46.3082	1.4703	153.9	459	76.5	13.9978	320.021	0.095	78	7.426	71.6	93.5	322	1.42	2.74	121.4
48	78	2	26.8	2	7.2	60.8	2	2	2	4	26	4.96	11.9143	8	75	107.51	48.9	19.58	6612	34.5888	22	44	138.426	0.44109	133.56	260	3	17.2431	314.963	0.018	132	7.421	79	92	411	2.12	0	341.7
49	78	1	17.1	1	3.2	36.7	2	1	1	13	21	12.2	11.1915	12.8	127	91.45	3000	6.71	2384	30.7456	16	85	48.9035	1.40244	98.28	480	253	15.8746	305.077	0.385	60	7.445	65.6	92.5	312	2.11	0.48	207.7
50	78	1	20.9	1	2.7	45.2	1	1	2	9	20	7.15	8.48	15	98	220.42	3000	100	1369	98.0016	37	72	38.6635	1.71912	154.26	386	21	13.4895	305.307	0.093	96	7.445	64.7	92.8	308	0.65	0.78	5000
51	65	1	21.5	1	3.1	45.8	1	1	2	8	21	7.46	8.74627	11	140	152.99	28.5	18.01	571	11.5296	13	26	155.461	0.53157	95.58	523	216	16.4611	314.733	0.342	101	7.32	.	.	341	1.25	1.19	17.8
52	90	2	31.4	1	3.8	39.5	1	1	1	7	23	17.63	41.7949	10.4	299	137.19	47.6	0.098	1630	11.5296	16	22	65.2251	0.82563	260.64	238	3	14.8971	293.582	0.01	67	7.26	.	.	353	1.63	2.37	62.8
53	66	1	25.9	1	3.3	33.3	2	1	1	11	22	20.43	18.4747	6.9	126	196.81	29.2	76.06	4231	27.8632	45	30	33.9947	1.97925	450.72	232	3	13.2158	308.986	0.002	73	7.422	119	98.7	566	0.83	0.47	0.25
54	78	1	25.2	1	4.4	45.5	1	1	1	10	20	9.41	22.175	12.6	103	279.68	471.6	77.33	877	34.5888	152	149	64.9253	1.09707	214.2	357	62	11.5736	308.986	0.507	73	7.26	.	.	298	1.17	1.57	122
55	67	1	26.2	1	3.3	40.6	1	2	1	8	21	4.57	6.87273	7.7	12	54.46	1486	1.49	674	179.67	83	236	73.0054	1.0179	94.5	1478	176.4	17.0867	335.194	0.629	80	7.441	69	95	187	1.03	2.16	23.9
56	79	1	25.6	1	3.4	41.5	2	1	1	8	19	12.63	16.8788	12.7	156	51.57	1101.5	10.27	1958	27.8632	32	123	50.6583	1.3572	92.52	686	23	13.294	317.262	0.134	72	7.306	323	99.3	1538	2.76	6.36	2203.6
57	71	1	20.9	1	4.5	44.7	1	1	2	4	17	5.06	18.84	13.1	7	290.73	131.2	100	5360	63.4128	79	107	22.8239	2.75964	165.6	622	47.3	13.7632	311.285	0.027	91	7.44	99	98	471	1.65	1.55	5000
58	69	1	29.8	1	3.9	37.7	1	1	2	7	17	18.65	40.7209	15	294	149.52	77.8	0.218	931	32.6672	179	264	100.286	0.76908	200.88	575	11.6	14.1542	351.977	0.009	92	7.47	89	97	424	0.87	6.43	5000
59	78	2	30.7	1	2.5	37.8	1	1	2	9	28	41.39	122.424	10.6	255	18.5	1217.3	69.85	15.31	42.2752	15	29	48.9513	1.08576	130.14	248	16	14.1151	372.438	0.039	96	7.22	.	.	348	2.42	1.52	74.74
60	70	2	25.4	1	3.8	41.6	1	1	2	10	21	13.38	12.8111	9.7	216	167.03	105.4	0.5	6543.8	27.8632	47	48	137.426	0.4524	266.58	257	8.2	14.8971	318.641	0.003	106	7.24	.	.	257	3.66	4.44	1121.7
61	66	2	19.9	2	7.1	72	2	2	2	5	16	13.69	9.7541	11.7	92	279.86	120.4	100	772	14.412	73	70	59.8986	0.93873	395.64	317	34.6	15.2881	296.571	0.004	100	7.451	62.6	92.9	311	2.52	2.1	2111.5
62	75	2	20	2	6	67.9	2	1	2	4	18	20.87	34.2586	10.2	391	159.15	623	22.2	1217	55.7264	19	41	22.1734	2.17152	265.68	251	21	18.377	302.548	0.007	91	7.364	132	98.6	628	2.08	1.29	899.9
63	70	1	22.9	2	6.3	80	2	1	1	8	23	37.02	33.619	12.3	180	258.61	797.3	7.46	5667	29.7848	38	55	44.5568	1.54947	165.6	485	13	14.7016	317.032	0.019	62	7.24	89	95	424	2.87	1.2	809.2
64	74	1	21.5	2	4.5	60.3	2	1	2	6	20	24.34	27.625	14.3	266	201.57	100.3	0.397	351	28.824	15	18	12.5762	4.59186	352.8	205	8	18.2206	307.376	0.017	97	7.405	66	93.3	314	4.12	3.14	198.7
65	66	2	27	2	4.6	69.8	1	1	2	3	17	17.39	25.9839	12.4	165	118.18	153.8	28.13	3088	49.9616	26	32	34.7623	1.50423	195.48	237	15.2	11.9646	319.101	0.006	98	7.43	110	98	524	1.88	3.21	2176.3
66	69	2	26.2	2	2	65.9	2	2	2	5	15	8.08	3.81169	10	257	3.19	50.5	0.05	3615	31.7064	32	33	123.472	0.49764	108.54	184	5	14.7798	329.217	0.001	92	7.398	72	94	398	3.13	2.67	989
67	89	2	30	2	7.5	68.5	2	1	2	8	19	28.44	32.8765	11.6	94	197.65	658.7	5.56	6878	60.5304	103	162	42.508	1.19886	166.86	514	13.1	13.1767	300.249	0.018	90	7.265	86.2	94	368	4.27	1.43	568
68	69	1	29.1	2	2.8	50.7	1	2	2	4	20	16.87	20.8333	14.5	110	287.52	21	1.85	619	58.6088	30	39	107.554	0.72384	236.16	469	23	17.2431	313.813	0.01	93	7.39	68	93	324	3.32	1	363.1
69	71	1	20.3	2	3	63	2	1	1	7	19	9.28	12.4848	12.4	168	187.38	18.2	9.03	5047	29.7848	18	28	45.1891	1.52685	157.32	249	14	13.7632	306.227	0.007	76	7.222	72.6	91.2	346	1.43	3.1	3216.7
70	68	2	18.3	2	4.9	72.8	1	2	2	8	21	16.14	15.0632	13.2	15	136.46	96.4	10.58	78	19.216	24	27	151.25	0.41847	325.62	213	13	12.3556	300.019	0.001	90	7.3	.	.	313	1.63	1.21	19.83
71	71	1	23.8	2	2.5	57	2	1	2	9	22	51.49	13.4319	4	38	146.46	67.7	16.56	10722	12.4904	34	52	47.2006	1.4703	137.34	417	10	12.9812	308.756	0.01	92	7.456	25.6	33.9	122	1.77	3.12	1129.6
72	77	1	24.7	2	6.4	55.9	2	2	2	4	17	12.16	33.3824	9.6	186	120.48	111	1.55	1440	20.1768	69	83	69.1951	1.04052	275.4	546	7.3	13.6068	337.493	0.011	93	7.547	58.8	91.7	280	1.6	3.21	999.6
73	72	2	23.3	2	4.6	56.1	1	2	2	5	16	16.08	#DIV/0!	3.4	255	26.74	51.5	0.529	768	15.3728	14	32	69.3426	0.81432	106.2	644	5.9	16.2265	305.307	0.001	110	7.421	92.1	97.9	439	2.16	2.76	678.23
74	65	2	22.8	2	5.1	70.5	2	2	2	5	16	7.33	24.963	11.7	82	27.18	96.7	0.195	116	31.7064	42	64	71.9493	0.80301	145.26	302	10	13.6459	318.871	0.002	113	7.469	67.9	94.7	323	2.71	1.93	776.14
75	87	2	24.6	1	3.6	39.3	2	1	2	6	20	12.03	4.96721	10.2	28	126.42	1347	100	15682	28.824	15	54	31.4961	1.56078	140.58	266	25	12.512	326.458	4.38	108	7.461	172	99.7	819	2.24	2.47	44.3
76	89	2	30.9	1	3.6	44.1	2	1	2	8	22	23.11	79.9286	3.2	211	24.46	292.6	100	2723	49.9616	64	237	44.4375	1.15362	85.14	311	10	14.7798	305.537	0.038	96	7.275	26.2	27.2	125	1.13	1.62	5000
77	42	1	19.5	2	7.1	61.9	2	2	2	3	24	7.16	13.2292	10	23	194.12	195.8	7.84	825	37.4712	48	181	125.734	0.68991	137.16	269	34	13.0594	301.169	0.008	163	7.5	74	96	352	3.08	1.45	256.91
78	64	2	26.7	1	3.2	38.8	2	1	2	7	18	27.45	32.675	11.1	53	168.06	157.9	100	24807	14.412	28	58	26.1739	1.93401	136.8	309	44.8	12.7075	336.114	1.13	88	7.408	62.3	91.8	297	5.49	7.41	1231.43
79	51	2	22.7	2	4.5	67.8	2	2	2	4	20	41.04	21.4483	11.6	296	184.93	53.7	5.57	247	37.4712	24	30	97.3832	0.64467	135.18	331	49	18.4552	309.905	0.001	112	7.52	141	99	671	1.65	1.1	32.14
80	53	1	19.3	1	3.2	43	2	1	1	14	18	9.14	7.36634	12.6	19	111.64	131.7	26.19	8923	12.4904	48	44	10.2972	5.79072	106.56	341	20.4	11.8082	307.376	0.867	79	7.41	86.8	96.4	413	3.47	1.35	2231.56
81	59	1	31.7	2	9.7	64.1	1	1	2	4	19	24.4	42.78	13.7	179	254.07	182.6	19.84	598	26.9024	225	247	52.7353	1.37982	158.4	592	14	16.813	284.156	0.003	132	7.424	96	96	432	4.44	2.51	1032
82	54	1	19.4	2	3.5	50.3	2	1	2	7	16	11.25	15.1912	12.1	37	106.75	139.2	7.79	612	24.9808	75	169	49.8973	1.4703	111.24	453	37.9	17.0476	295.651	0.005	126	7.484	95	97.3	452	1.12	0.79	667.8
83	50	2	19.8	2	3.1	50.1	2	1	2	8	17	3.19	30.2	8.1	29	89.6	145.1	42.49	1215	45.1576	39	47	38.79	1.43637	99.9	326	27.1	14.5452	308.526	0.004	90	7.436	73.5	93.6	350	3.13	1.66	4724
84	38	1	22.6	2	4.7	63.1	2	1	2	4	18	10.6	7.10833	16.5	339	347.36	48.9	76.48	235	62.452	77	63	59.3426	1.34589	190.62	178	25	17.9469	319.331	0.005	172	7.426	87	89	312	4.48	0.37	2138
85	62	1	19.7	2	5.6	60.2	2	2	2	2	15	8.71	42	13	184	148.08	153.3	8.56	989	19.216	18	23	57.6223	1.26672	131.94	242	13.8	13.4113	316.113	0.141	118	7.579	138	99.1	655	2.34	5.12	2222
86	57	2	30.1	2	3	56.2	2	2	2	8	19	1.74	1.23529	9	81	94.13	64.2	58.89	2932	62.452	48	32	59.2306	0.97266	159.84	259	12	15.3663	309.445	0.022	89	7.362	76.3	93.5	364	5.47	6.69	5000
87	34	2	25	2	6.3	70.7	1	1	1	9	22	74.56	76.6957	11.5	32	149.63	412	100	527	87.4328	226	338	24.1405	2.31855	79.02	829	6	14.5843	306.916	0.001	86	7.333	71.1	91.9	338	2.45	1.43	5000
88	52	2	25.6	2	4.7	57.2	2	2	2	3	16	8.96	19.0476	11.8	276	225.61	52.3	5.22	586	30.7456	23	34	107.841	0.58812	111.6	221	3.4	19.941	312.664	0.02	121	7.371	100	98	476	1.23	2.13	789
89	59	2	25.2	1	2.8	42.9	2	2	2	4	18	9.29	6.4322	9.4	177	49.99	213.1	8	4032	12.4904	11	44	94.5448	0.64467	55.62	217	21	13.9978	246.223	1.17	99	7.458	44.5	80.1	212	3.13	4.28	655.7
90	61	1	25.3	1	3.8	40.6	2	1	1	10	18	10.19	14.7966	13.8	24	124.6	3000	100	11808	22.0984	126	477	35.4768	1.93401	307.8	1130	262.2	16.422	329.677	4.68	78	7.285	58	86	297	1.81	1.84	47.7
91	59	1	25.8	1	3	37.3	1	1	1	13	23	4.49	4.74324	13.2	32	114.68	3000	6.35	1733	41.3144	259	793	9.08557	6.3336	108	3888	136	20.0974	323.929	0.128	77	7.179	132	97.1	629	0.71	0.19	1960
92	50	1	20.2	1	4.2	37.5	2	1	1	10	15	14.82	24.5	8.6	30	188.47	69.4	14.54	4487	61.4912	55	190	54.5373	1.37982	146.16	192	31	141.933	301.169	0.149	89	7.412	66.9	92.5	319	1.26	2	1934
93	57	1	22	2	6.6	55.2	2	1	2	3	18	25.38	20.9815	9.8	344	230.91	59.3	100	443	19.216	85	116	18.802	3.393	106.56	384	3	22.7171	316.113	0.001	90	7.454	141	98.9	670	2.07	6.5	68.35
94	43	1	21.4	2	4.4	62	2	2	2	2	17	15.46	26.902	14.3	148	276.02	21	39.34	1005	9.608	87	73	120.562	0.71253	379.44	359	4	15.5618	288.524	0.001	119	7.405	127	98.7	607	0.57	2.55	604.5
95	48	2	21.2	1	2.8	37.1	2	2	1	9	13	4.05	6.05357	13.3	158	33.64	32.9	8.1	1029	18.2552	19	18	94.7425	0.66729	114.48	212	11.9	14.6625	326.688	0.081	79	7.378	61.2	90	292	2.58	2.01	637.4
96	59	1	20.4	2	7.4	57.2	2	1	1	10	17	8.52	14.2182	14.4	63	145.58	564	100	4566	28.824	29	48	43.9039	1.61733	81.54	267	23	15.7573	303.928	0.008	85	7.43	60.3	91.3	287	1.75	0.29	312
97	54	2	20.3	2	8.5	61.6	2	1	2	2	24	24.04	18.2562	14.5	214	177.16	85	25.51	1156	46.1184	34	27	15.1483	3.20073	588.96	378	6	13.5286	294.042	0.002	189	7.376	89.2	96.6	425	46.14	1.09	101.56
98	56	2	25.9	1	3.9	43.9	2	2	2	6	18	25.99	35.3521	14	5	263.56	34.2	7.05	13765	59.5696	44	39	66.5336	0.88218	155.7	356	8	12.3947	316.113	0.044	106	7.352	78.9	94.5	356	2.98	2.98	5000
99	61	2	24.8	2	5	60.2	2	2	2	6	13	7.1	3.28571	10.8	52	240.18	136.5	1.08	1367	56.6872	78	130	88.5099	0.6786	104.76	799	22.8	15.6009	322.78	0.152	87	7.35	62	90	356	1.21	1.43	822.1
100	51	1	28.3	2	7.5	52.8	2	2	2	2	22	21.23	54.0833	10.2	111	213.12	55.6	40.1	673	122.982	52	77	99.8264	0.81432	109.8	301	13	16.1092	318.871	0.011	162	7.281	78	87.2	218	1.56	2.76	1106
101	54	1	31.4	1	3.1	45.5	2	1	1	14	20	31.92	19.8267	8.1	29	193.42	367.5	64.47	14875	47.0792	16	15	22.4227	2.9406	321.66	254	9	17.5168	300.249	0.002	81	7.358	112	97.8	533	0.98	0.87	2563.23
102	47	1	19.2	1	3.9	49.4	2	2	2	3	18	18.83	13.2121	11.2	105	234.43	41.8	42	5689	45.1576	34	36	71.1104	1.10838	202.14	179	56	17.7905	316.802	0.236	92	7.342	78	94	386	1.12	3.17	989
103	46	1	27.3	2	6.7	58.2	2	1	2	2	17	12.19	15.5441	14.6	347	69.56	68.8	2.57	67	88.3936	22	15	48.9328	1.53816	646.38	221	9	19.7846	309.905	0.007	92	7.286	112	97.3	535	1.87	2.28	211.5
104	28	1	23.6	2	7.6	77.4	2	2	2	5	19	7.28	4.83036	12.9	153	85.36	21	0.66	267	10.5688	48	20	118.424	0.78039	162.54	152	6	13.294	310.595	0.011	145	7.316	.	.	399	0.99	1.42	47.8
105	63	1	18.8	2	3.4	65.1	1	2	2	2	17	26.02	12.6236	11.8	395	189.69	21	0.154	135	15.3728	144	78	111.568	0.71253	92.16	277	5	17.5559	300.249	0.004	116	7.491	71.2	95.7	339	0.67	2.33	174.9
106	60	1	25.5	2	5.3	57.2	2	1	1	13	26	5.61	12.1622	7.9	28	43.08	1023	51.77	295	84.5504	29	65	35.1216	1.95663	145.62	235	63	17.1258	302.548	0.018	82	7.289	69.7	89.2	298	1.9	2.31	668.7
107	54	2	28.8	2	8.6	66.1	2	2	2	2	12	2.99	9.92593	12.1	145	1.27	98.8	13.25	432	10.5688	27	95	54.7136	1.05183	607.86	249	15	13.685	296.801	0.001	95	7.382	151	98.7	721	1.04	1.04	96.53
108	50	1	28.1	1	4.1	43.1	2	1	1	10	21	29.38	6.31373	19.6	6	30.33	516.5	2.47	2458	63.4128	66	56	32.5118	2.16021	188.46	436	34.5	13.4895	309.216	0.104	70	7.438	102	97.5	486	4.09	0.89	34.6
109	59	1	24.9	1	3.4	44	1	1	2	4	23	41.3	58.9394	3.1	594	154.33	267.5	4.18	3597	112.414	77	228	22.4209	2.89536	368.1	690	10.1	24.5548	333.125	0.05	88	7.345	90	96.9	429	1.11	0.98	987.25
110	22	2	21.6	1	3.3	44.7	2	2	1	9	16	19.25	13.7323	10.3	281	87.9	156.7	92.88	3648	16.3336	17	47	58.3545	1.16493	104.94	743	68	15.7573	310.825	1.53	84	7.422	111	98.2	528	1.76	0.73	30.8
111	53	1	25.2	1	3.5	47.3	2	1	1	14	22	13.43	21.4643	14.1	23	227.49	3000	21.97	2598	100.884	68	128	51.9264	1.42506	188.64	358	32.7	12.1992	309.216	0.028	72	7.22	118	98	213	1.58	1.09	5000
112	47	1	29.7	2	3.9	56.3	2	2	2	4	13	13.5	11.25	12.2	211	23	47.5	1.37	4523	29.7848	54	56	91.1898	0.89349	284.4	312	78	12.5511	313.124	2.68	95	7.46	90	94	403	0.86	1	11
113	64	2	32.4	2	7.1	62.6	2	1	2	2	14	28.43	35.141	10.8	221	99.23	213.3	76.17	3483	30.7456	14	25	37.5761	1.41375	198	219	15	14.0369	308.066	0.006	99	7.479	104	97.9	494	0.75	0.19	176.32
114	54	2	32.4	1	4	37.4	2	1	2	4	19	3.1	2.13265	9.3	79	54.88	41.6	0.746	3484	14.412	62	69	24.587	2.10366	205.74	315	7	15.7573	314.043	0.005	146	7.38	119	99	378	2.44	3.04	2.48
115	55	2	18.8	2	5	64.3	2	1	1	10	18	34.63	66.64	11.9	44	260.41	336	100	5139	32.6672	65	66	26.4553	1.96794	307.44	845	12	15.2881	284.156	0.008	79	7.469	97.4	97.4	464	2.02	4.17	3288
116	63	2	23.4	2	8	60	2	1	2	2	20	8.72	2.94301	9.1	178	75.59	140.9	11.02	276	11.5296	86	156	18.2835	2.64654	102.24	524	8	17.7905	301.399	0.005	100	7.37	91.5	96.3	436	2.12	1.98	85.1
117	59	2	22.4	1	3.3	47.5	2	2	1	11	18	11.63	29.8378	9.1	323	136.32	430.9	5.23	584	40.3536	59	119	64.8717	0.89349	191.52	406	24.1	9.9314	276.34	0.362	77	7.54	237	100	1129	2.32	4	1075
118	45	1	31.7	1	4.2	38.5	2	1	2	2	16	16.57	56.2963	13.9	124	62.53	3000	5.29	677	25.9416	39	182	66.9862	1.17624	97.56	572	125.2	15.5227	307.376	0.284	105	7.531	97.7	97.6	465	1.24	2	611.2
119	40	1	22.3	2	7.5	55.2	2	1	1	10	24	9.39	3.2029	13.7	56	251.6	1235.8	44.99	3534	42.2752	265	1062	14.2897	4.58055	98.28	3218	35.2	24.0856	294.502	0.21	70	7.39	76	95	362	2.44	1.05	716.5
120	62	1	23.3	1	3.3	43.3	2	1	2	3	21	11.7	18.9828	11.5	173	95.78	517.9	100	2037	100.884	307	612	15.626	3.92457	151.02	238.7	56.8	16.8521	309.216	0.006	107	7.249	117	98	558	3.66	2.16	6201.95
121	56	1	24.7	2	7.4	56	2	1	2	4	18	33.55	9.35099	9.7	590	212.3	418.7	100	6500	34.5888	22	15	50.883	1.43637	77.4	223	4.5	13.0985	329.677	0.004	90	7.47	94	98	423	1.35	1.42	5000
122	57	2	30.7	1	3.9	31.8	2	1	1	5	23	15.78	36.9512	8	35	198.23	156.8	100	31053	0	33	22	18.209	2.70309	296.82	238	8.6	18.9635	326.458	0.004	82	7.284	25.4	37.5	121	5	2.18	578.41
123	63	1	23.4	1	3.7	39.3	1	1	1	7	19	2.37	1.18367	12.6	52	21.6	395.7	6.66	900	88.3936	107	220	30.8353	2.17152	125.46	237	31	14.7016	308.526	0.025	82	7.478	64.3	92.4	306	2.39	2.17	5000
124	35	2	20.1	1	3.5	37.8	2	1	1	6	16	5.52	33.1875	10.5	4	226.03	924.6	100	35000	48.04	40	55	27.1866	2.08104	110.7	346	29.4	14.5843	297.491	0.178	83	7.455	101	97.7	480	3.11	1.23	236.7
125	61	2	19	2	3	57.9	1	1	1	4	14	17.19	28.1034	8.6	34	217.34	139.2	11.75	3461	17.2944	25	16	55.4348	1.0179	295.74	293	6.9	14.3888	341.401	0.025	88	7.362	230	100	323	0.8	2.83	172.3
126	51	2	31.6	2	6.4	56.2	2	2	1	3	15	2.01	7.65217	12	169	77.55	2765	75.84	294	38.432	49	129	47.082	1.21017	554.22	323	17.2	12.0819	309.445	0.004	83	7.419	126	98.9	598	0.36	0.22	177.2
127	56	2	33.2	2	4.8	66	2	2	1	5	18	1.57	1.20896	11	147	25.98	452.3	29.48	197	51.8832	87	46	101.703	0.61074	120.06	289	21	13.685	311.744	0.006	85	7.285	62.5	88.8	298	1.87	1.39	128.6
128	52	1	16.5	2	3.8	59.6	2	1	2	3	20	24.17	50.9556	7.9	532	251.35	65.4	100	1837	27.8632	48	18	15.2278	4.13946	66.78	203	10.4	21.0749	307.836	0.002	95	7.3	.	.	376	1.8	0.93	35.7
129	47	2	20	2	4	64.3	2	2	2	2	16	4.63	1.76552	12.2	180	31.2	51.8	0.82	95	22.0984	30	50	1502.39	0.061074	111.6	537	2.5	16.2656	307.146	0.01	105	7.48	56	91	267	0.57	1.62	39.5
130	58	1	25.9	2	5.1	69.7	2	2	2	3	14	5.86	12.0244	14.3	208	0.31	25.1	0.024	612	24.9808	95	89	1409.02	0.080301	117.18	234	11.9	17.6732	302.318	0.01	109	7.445	144	99	684	1.44	0.84	2.74
131	50	1	24.8	2	4.6	56.4	2	2	2	5	17	9.69	19.4667	12.9	288	245.53	42.1	4.18	2210	29.7848	15	33	568.589	0.18096	139.86	241	2.9	18.6116	300.709	0.002	116	7.422	77.4	96	368	2.22	2.78	1173
132	61	2	20	2	5.9	62.6	2	1	1	9	22	9.55	20.9268	6.4	291	123.95	898	3.35	2378	39.3928	28	25	22.1872	2.25069	177.66	265	16.7	12.4338	322.55	0.001	69	7.42	110	98	278	2.26	5.01	260.2
133	21	1	24.8	2	6.4	68.3	2	1	2	2	28	35.82	28.1552	18.3	346	134.19	480	29.2	4561.5	28.824	49	35	26.6872	2.98584	885.6	491	50	22.4825	297.95	0.025	121	7.229	107	96.5	508	1.84	2.69	96.4
134	58	2	25.3	2	6.7	55.8	2	2	2	3	18	21.49	14.1797	12.1	214	256.37	92.4	42	256	34.5888	24	20	42.634	1.28934	184.32	185	11.7	17.3604	305.997	0.008	121	7.318	158	98.8	752	0.91	0.96	23.2
135	49	1	26.6	2	6.9	63.5	2	2	2	3	21	2.29	2.9434	7.8	53	161.92	108.7	3.09	317	44.1968	9	32	13.1494	4.7502	100.62	832	8	18.8853	302.089	0.018	123	7.41	135	99	316	1.25	6.15	54.5
136	53	1	22.7	2	6.5	57.9	2	1	2	6	23	41.77	58.6812	5.1	35	93.44	21	0.374	1027	20.1768	29	37	166.109	0.52026	119.7	421	2.5	16.7348	304.158	0.006	127	7.54	74	96	276	2.21	2.54	196.7
137	21	2	21.2	2	3.9	63.8	2	1	2	5	16	12.51	40.1	13.4	180	221.22	53.7	39.87	274	33.628	23	31	80.007	0.89349	117	199	5	17.0476	313.124	0.006	131	7.416	83.1	96.6	396	0.44	2.14	5000
138	49	1	18.9	2	9.1	71.1	1	2	2	5	24	23.51	55.8718	7.2	92	193.87	140.6	38.37	731	108.57	49	65	109.356	0.75777	94.14	267	9	11.8864	290.134	0.005	136	7.363	37.3	57.2	178	2.16	3.34	1647
139	51	2	21.7	2	2.8	55.3	2	2	2	3	19	24.07	85.5556	10.2	460	29.92	30.9	51.67	1394	40.3536	11	22	58.9971	0.99528	493.38	312	11.9	19.1981	283.237	0.003	156	7.408	87.6	96.4	417	2.22	1.26	199.1
140	33	2	27.7	2	2.9	52.7	1	2	2	2	18	7.59	4.67717	9.1	265	14.58	76.8	0.081	927	31.7064	57	112	214.838	0.35061	153.36	277	6	15.64	316.113	0.007	167	7.444	166	99	790	1.05	2.76	109.4
141	55	1	26.1	2	4.5	58.1	1	2	2	2	20	3.76	9.08824	11.9	156	11.42	232.2	0.523	85	10.5688	131	446	218.765	0.40716	116.1	1194	21.8	15.64	320.94	0.006	187	7.472	59.6	89.9	284	3.56	6.54	1007.87
142	54	1	25.3	2	4.8	71.1	1	2	2	9	22	5.55	2.34161	13.7	28	57.8	47.8	0.787	960	16.3336	405	272	101.935	0.7917	111.06	1038	13	13.3331	290.824	0.006	147	7.44	60	92	95	0.97	1.06	3.58
143	62	1	24.6	2	4.5	61.4	2	2	2	3	26	6.35	11.2083	12.1	119	7.85	68.8	0.231	1080	17.2944	109	125	139.676	0.58812	239.4	305	46	15.1317	270.822	0.02	172	7.398	111	97.9	530	1.52	2.77	32.2
144	64	1	26	2	3.8	58.9	2	1	2	2	24	5.41	7.64516	14.2	201	281.61	134.8	75.11	3455	60.5304	18	38	32.4878	2.06973	153.9	359	44.7	16.5784	310.825	0.414	138	7.355	86.1	95.7	410	1.78	1.92	67.3
145	72	1	20.7612	2	7.1	57.7	2	2	1	12	32	3.12	6.18605	16.2	111	222.12	3000	81.55	1309	80.03	38	72	70.41	1.05	161.28	273	16	13.29	303.24	0.01	67.33	7.44	51	87	243			5000
146	58	2	24.5243	1	2.2	27.9	1	1	2	8	8	14.48	13.4301	7.5	182	120.46	86.5	4.56	35000	12.4904	215	60	36.5	1.54947	278.28	209	3	15.5227	306.916	0.365	87	7.45	132	99	.			45.4
147	79	1	20.9572	2	5.5	64.9	1	2	2	7	11	15.62	31.1702	11.3	35	125.63	2238	100	8104	23.0592	77	239	31.4	1.96794	114.3	438	82	13.2549	318.641	0.329	87	7.466	101	98	.			359
148	61	2	30.0433	2	5.6	62.3	2	1	2	4	18	25.77	26.9775	5.9	415	194.15	58.7	3.77	12800	10.5688	6	14	28.2	1.88877	189	312	13.9	15.4054	328.757	0.01	101	7.38	39	54	138			109
149	77	1	22.8624	2	4.8	57.8	2	1	2	7	21	16.5	93.4118	11.3	391	265.27	708	42	13029	9.608	16	38	8.7	5.77941	539.46	494	21	21.8178	303.698	0.22	78	7.3	93	96	800			67.6
150	65	2	22.8624	2	4.5	68	2	2	1	4	7	11.22	23.3696	14.9	190	7.44	65.8	24.9	350	37.4712	21	26	48	1.18755	281.34	287	6	17.4386	326.918	0.001	83	.	.	.	.			5000
151	66	1	18.1252	2	3.8	57.5	2	1	2	10	14	25.69	33.2533	9.2	59	76.48	54.3	2.64	35000	9.608	19	19	22.9	2.75964	114.12	274	3	14.6234	316.113	0.01	94	7.288	92.4	96.3	440			13
152	34	2	19.5312	2	3.9	66.8	2	1	1	6	24	22.47	7.55785	6.8	226	70.18	89.6	0.182	1260	14.412	27	45	31.3	2.02449	212.22	395	14	15.5618	338.873	0.01	102	7.19	141	99	671			31.3
153	71	2	21.4844	2	5.7	63.8	2	1	2	7	22	4.45	5.32258	9.7	145	228.21	57.7	17.8	917	8.6472	26	29	20.9	2.28462	338.94	222	8	14.2715	336.574	0.01	81	7.422	158	99.1	752			14.9
154	58	2	20.202	2	5.6	60.3	2	1	1	7	8	30.18	21.9291	12	121	155.61	66.4	100	4250	0	10	17	52.8	1.63995	263.52	290	10.6	15.4445	305.307	0.01	66	7.38	146	99	695			643
155	60	2	19.5312	2	4.5	62.1	1	2	2	3	6	6.63	10.9608	9.7	138	181.29	142	41.2	511	13.4512	158	266	51.5	1.15362	168.66	509	8.2	14.3497	306.687	0.01	76	.	.	.	.			125
156	73	2	21.9289	2	4.2	63.3	2	1	2	3	13	12.21	31.0541	12.5	127	269.81	40.5	30.5	1070	40.3536	24	37	25.7	1.90008	160.56	404	32	15.0144	312.664	0.01	126	.	.	.	.			.
157	75	1	20.7612	2	4.6	55.2	2	1	1	9	16	15.67	44.1765	12.2	90	144.04	92.6	42.5	5670	25.9416	19	25	14	3.93588	146.88	321	11.1	13.4504	291.973	0.03	56	7.418	88.2	96.9	420			5000
158	44	1	22.4913	2	5.5	66.6	1	2	1	6	6	3.71	15.087	13.8	70	123.61	507	93.3	2170	32.6672	176	241	82.5	1.08576	110.16	528	133	14.1151	324.619	1.1	81	7.493	73.8	95.8	351			5000
